# Supplementary material for: The effect of separation of blocks on the crystallization kinetics and phase composition of poly(butylene adipate) in multi-block thermoplastic polyurethanes
Source: Royal Society of Chemistry journal article supplement (doi:10.1039/d1cp04684e), 2021-12-15
Supplement: d1cp04684e1.pdf [file d1cp04684e1.pdf]

## Supporting Information

### Effect of separation of blocks on crystallization kinetics and phase composition of poly(butylene adipate) in multi-block thermoplastic polyurethanes

Marina A. Gorbunova,<sup>\*ab</sup> Evgenii V. Komov,<sup>b</sup> Leonid Yu. Grunin,<sup>c</sup> Mariya S. Ivanova,<sup>c</sup> Ainur F. Abukaev,<sup>d</sup> Arina M. Imamutdinova,<sup>b</sup> Dimitri A. Ivanov,<sup>abe</sup> Denis V. Anokhin,<sup>\*\*abc</sup>

<sup>a</sup> Institute for Problems of Chemical Physics Russian Academy of Sciences, Semenov Prospect 1, 142432 Chernogolovka, Russia.

<sup>\*</sup> [zav@icp.ac.ru](mailto:zav@icp.ac.ru)

<sup>b</sup> Lomonosov Moscow State University, Leninskie Gory 1, 119991 Moscow, Russia.

<sup>\*\*</sup> [deniano@yahoo.com](mailto:deniano@yahoo.com)

<sup>c</sup> Volga State University of Technology, Lenin sq. 3, 424000, Yoshkar-Ola, Russia.

<sup>d</sup> Moscow Institute of Physics and Technology, Institutskiy per. 9, 141700 Dolgoprudny, Russia

<sup>e</sup> Institut de Sciences des Matériaux de Mulhouse, CNRS UMR 7361, 15 Jean Starcky, F-68057 Mulhouse, France

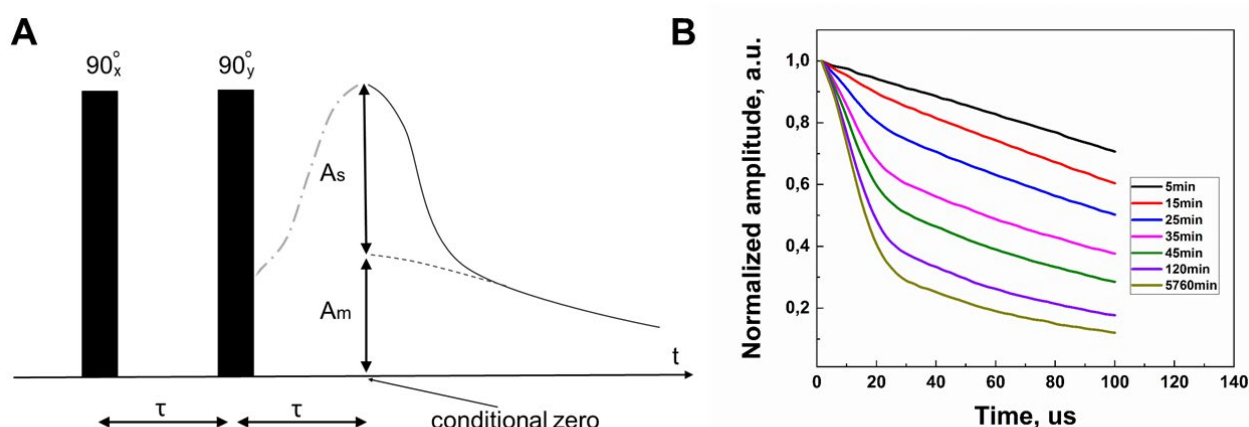

**Fig. S1** Pulse sequence diagram of the SE signal (A) and normalized SE decays of TPU-IPDI recorded in crystallization at 20 °C after cooling from 150 °C (B).

The solid-state echo decay pulse train consists of a 90° at RT pulse in the x direction followed by a 90° pulse in the y direction after a delay time  $\tau$ . Continuously increasing  $\tau$  and registering the maximum of the echo signal by  $2\tau$ , at the top of which a conditional zero is established, the decay of the transverse magnetization is recorded.

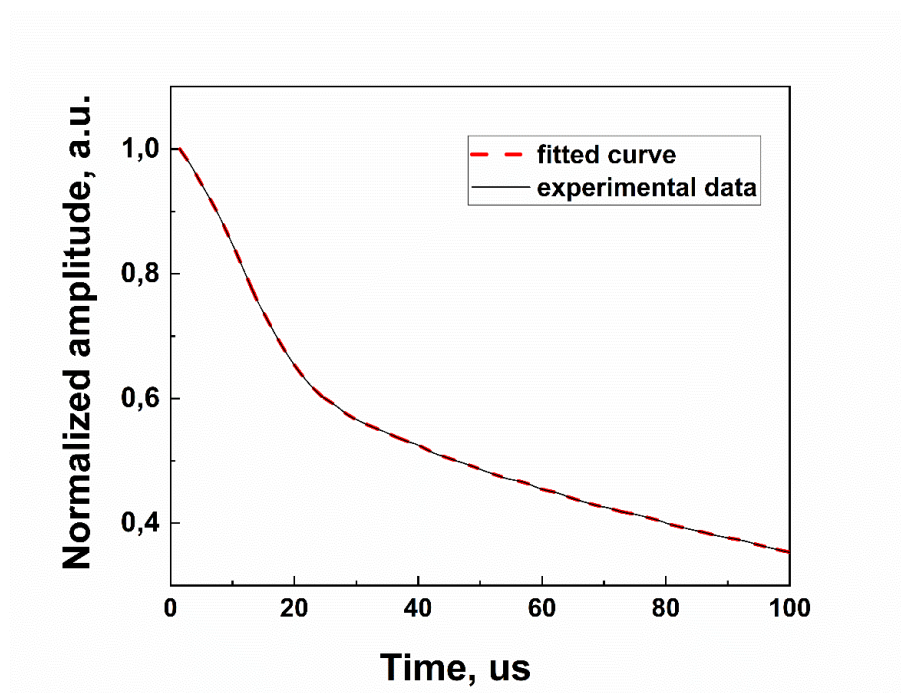

**Fig. S2** Experimental and fitted dependence of the Free Induction Decays (FID) of a two-step damping form Gaussian to exponential due to differences in the segmental mobility of the rigid and amorphous phases.

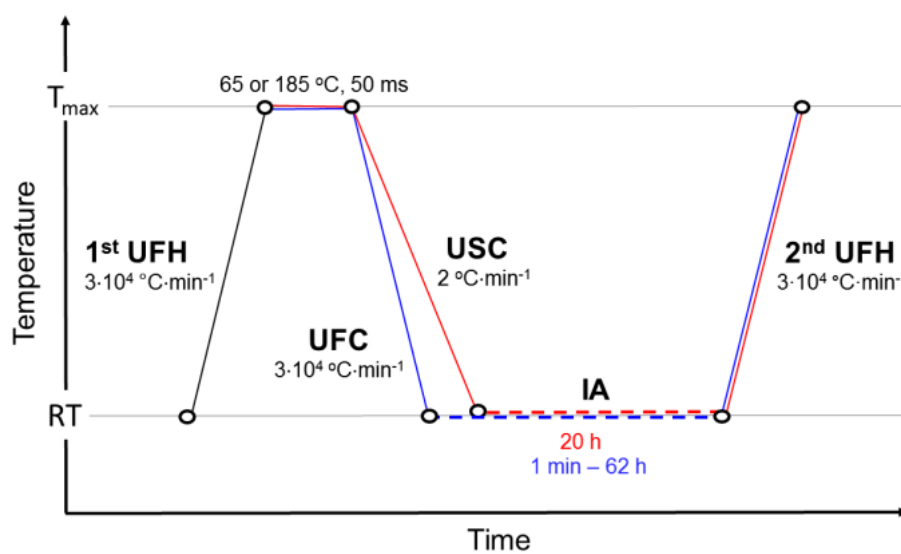

**Fig. S3** Temperature programs for nanocalorimetric measurements: Program 1 (black line), Program 2 (red lines) and Program 3 (blue lines).

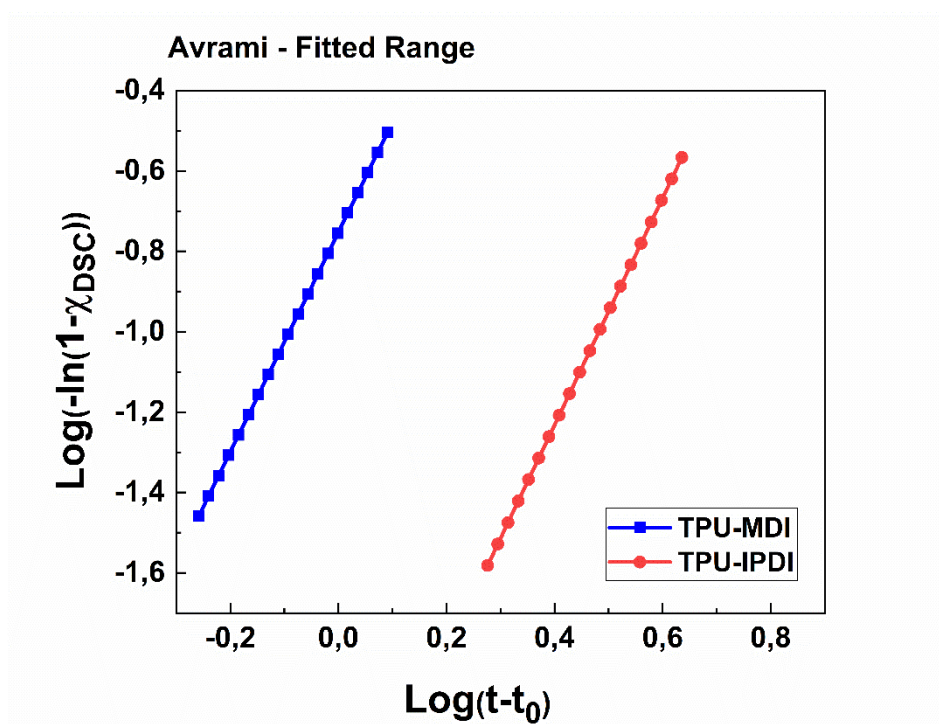

**Fig. S4** Time dependence of  $\chi_{\text{DSC}}$  in Avrami coordinates for TPU-MDI (blue curve) and TPU-IPDI (red curve).

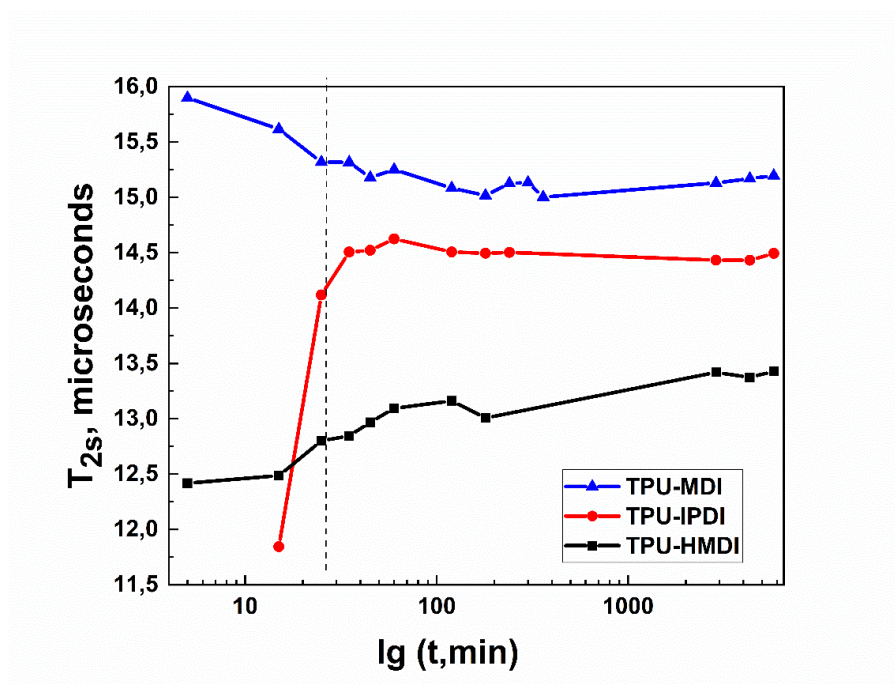

**Fig. S5** Changes in the spin-spin relaxation time  $T_{2s}$  during crystallization at 20 °C after cooling from 150 °C.

Normally, the general trend in relaxation time of a rigid fraction with cooling and crystallizing should show the decrease of  $T_{2s}$ . For the sample TPU-HMDI we observe definitely reversed behavior that can be explained by more intensive magnetization exchange between crystals and amorphous regions due to presence of in intermediate mesophase.

**Table S1** Main frequencies and assignments of FTIR bands to crystal phases of PBA oligodiol.

| Main assignment               | Wavenumber, $\text{cm}^{-1}$ | Phase   | Wavenumber, $\text{cm}^{-1}$ | Phase    | Wavenumber, $\text{cm}^{-1}$ | Phase    |
|-------------------------------|------------------------------|---------|------------------------------|----------|------------------------------|----------|
|                               | 20 °C/min                    |         | 2 °C/min                     |          | storage at RT                |          |
| $\gamma$ CH <sub>2</sub>      | 911                          | $\beta$ | 908                          | $\alpha$ | 908                          | $\alpha$ |
| $\gamma$ CH <sub>2</sub>      | 930                          | $\beta$ | -                            | $\alpha$ | -                            | $\alpha$ |
| $\gamma$ CH <sub>2</sub>      | 958                          | $\beta$ | 957                          | $\alpha$ | 957                          | $\alpha$ |
| $\sigma_s$ CH <sub>2</sub>    | 1371                         | $\beta$ | 1368                         | $\alpha$ | 1368                         | $\alpha$ |
| $\sigma_{as}$ CH <sub>2</sub> | 1401                         | $\beta$ | 1398                         | $\alpha$ | 1398                         | $\alpha$ |
| $\delta_s$ CH <sub>2</sub>    | 1416                         | $\beta$ | 1418                         | $\alpha$ | 1418                         | $\alpha$ |
| $\delta_{as}$ CH <sub>2</sub> | 1464                         | $\beta$ | 1461                         | $\alpha$ | 1461                         | $\alpha$ |
| $\nu_{as}$ C-O-C              | 1258                         | $\beta$ | 1257                         | $\alpha$ | 1257                         | $\alpha$ |
| $\nu_s$ C-O                   | 1162                         | $\beta$ | 1160                         | $\alpha$ | 1160                         | $\alpha$ |

Thus, it has been established that upon 20 °C/min cooling, the pure  $\beta$ -form crystallizes, while upon 2 °C/min cooling, the pure  $\alpha$ -form crystallizes («fresh»). Storage («old») of PBA at RT leads to the formation of the  $\alpha$ -phase.

**Table S2** Main frequencies and assignments of FTIR bands to crystal phases of PBA in TPUs.

| Main assignment               | wavenumber, $\text{cm}^{-1}$ | phase          | wavenumber, $\text{cm}^{-1}$ | phase          | wavenumber, $\text{cm}^{-1}$ | phase          |
|-------------------------------|------------------------------|----------------|------------------------------|----------------|------------------------------|----------------|
|                               | TPU-MDI                      |                | TPU-IPDI                     |                | TPU-HMDI                     |                |
| 2 °C/min after 65 °C          |                              |                |                              |                |                              |                |
| $\gamma$ CH <sub>2</sub>      | 910                          | $\alpha+\beta$ | 910                          | $\alpha+\beta$ | 909                          | $\alpha+\beta$ |
| $\gamma$ CH <sub>2</sub>      | 930                          | $\alpha+\beta$ | 930                          | -              | 930                          | $\alpha+\beta$ |
| $\gamma$ CH <sub>2</sub>      | 959                          | $\beta$        | 960                          | $\beta$        | 959                          | $\beta$        |
| $\sigma_s$ CH <sub>2</sub>    | 1369                         | $\alpha+\beta$ | 1369                         | $\alpha+\beta$ | 1368                         | $\alpha$       |
| $\sigma_{as}$ CH <sub>2</sub> | 1397                         | $\alpha$       | 1398                         | $\alpha$       | 1396                         | $\alpha$       |
| $\delta_s$ CH <sub>2</sub>    | 1415                         | $\alpha+\beta$ | 1418                         | $\alpha$       | 1417                         | $\alpha$       |
| $\delta_{as}$ CH <sub>2</sub> | 1462                         | $\alpha$       | 1461                         | $\alpha$       | 1463                         | $\alpha+\beta$ |
| 20 °C/min after 150 °C        |                              |                |                              |                |                              |                |
| $\gamma$ CH <sub>2</sub>      | 910                          | $\alpha+\beta$ | 910                          | $\alpha+\beta$ | 910                          | $\alpha+\beta$ |
| $\gamma$ CH <sub>2</sub>      | 930                          | $\alpha+\beta$ | 930                          | $\alpha+\beta$ | 930                          | -              |
| $\gamma$ CH <sub>2</sub>      | 959                          | $\beta$        | 958                          | $\beta$        | 958                          | $\beta$        |
| $\sigma_s$ CH <sub>2</sub>    | 1369                         | $\alpha+\beta$ | 1368                         | $\alpha$       | 1368                         | $\alpha$       |
| $\sigma_{as}$ CH <sub>2</sub> | 1397                         | $\alpha$       | 1398                         | $\alpha$       | 1396                         | $\alpha$       |
| $\delta_s$ CH <sub>2</sub>    | 1414                         | $\beta$        | 1418                         | $\alpha$       | 1417                         | $\alpha$       |
| $\delta_{as}$ CH <sub>2</sub> | 1461                         | $\alpha+\beta$ | 1461                         | $\alpha$       | 1461                         | $\alpha$       |
| 20 °C/min after 185 °C        |                              |                |                              |                |                              |                |
| $\gamma$ CH <sub>2</sub>      | -                            | -              | -                            | -              | 909                          | $\alpha+\beta$ |
| $\gamma$ CH <sub>2</sub>      | -                            | -              | -                            | -              | 930                          | $\alpha+\beta$ |
| $\gamma$ CH <sub>2</sub>      | -                            | -              | -                            | -              | 959                          | $\beta$        |
| $\sigma_s$ CH <sub>2</sub>    | -                            | -              | -                            | -              | 1369                         | $\alpha+\beta$ |
| $\sigma_{as}$ CH <sub>2</sub> | -                            | -              | -                            | -              | 1398                         | $\alpha+\beta$ |
| $\delta_s$ CH <sub>2</sub>    | -                            | -              | -                            | -              | 1417                         | $\alpha$       |

|                          |   |   |   |   |      |         |
|--------------------------|---|---|---|---|------|---------|
| $\gamma$ CH <sub>2</sub> | - | - | - | - | 1463 | $\beta$ |
|--------------------------|---|---|---|---|------|---------|

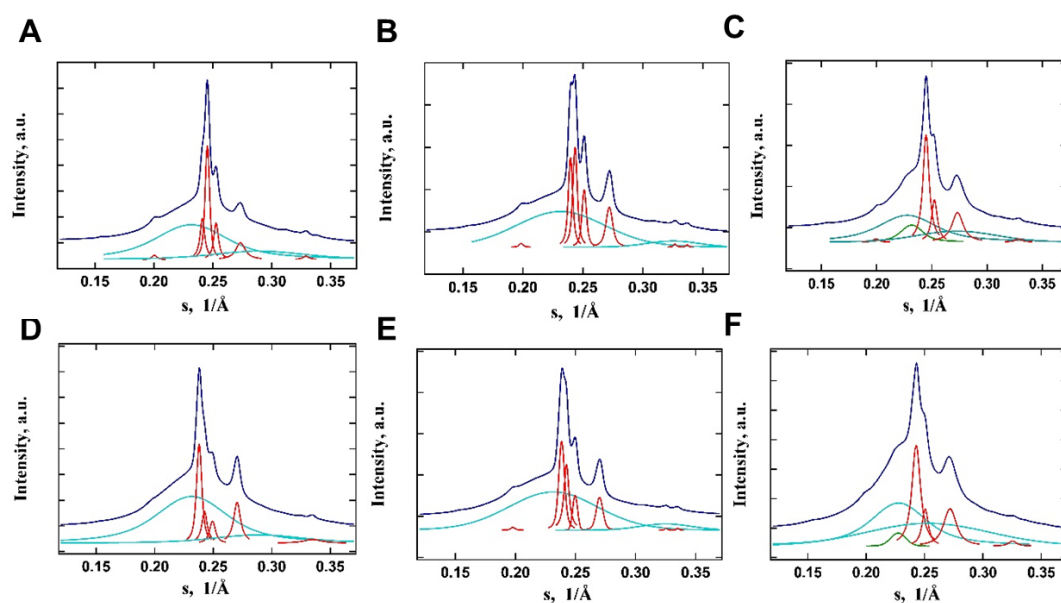

**Fig. S6** Fitting with set of Gaussians of WAXS patterns of TPU-MDI (A, D), TPU-IPDI (B, E) and TPU-HMDI (C, F) after long storage (A-C) and after crystallization from 150 °C for 20 hours at RT (D, F). Red, cyan and green curves indicate crystalline, amorphous and mesophase peaks, respectively.

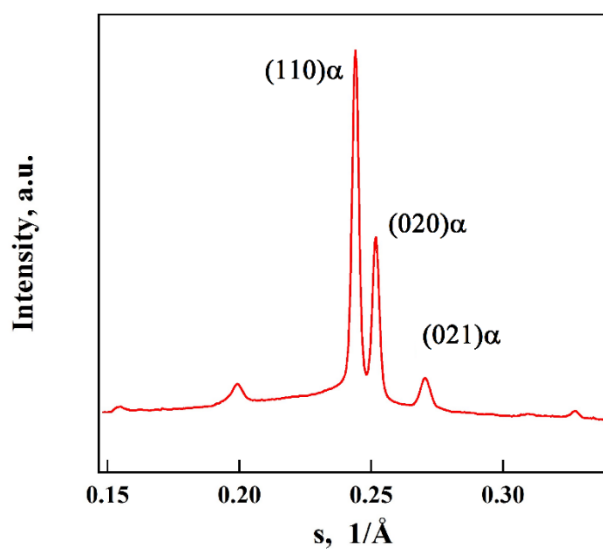

**Fig. S7** WAXS diffractogram of PBA oligodiols (only  $\alpha$  modification).

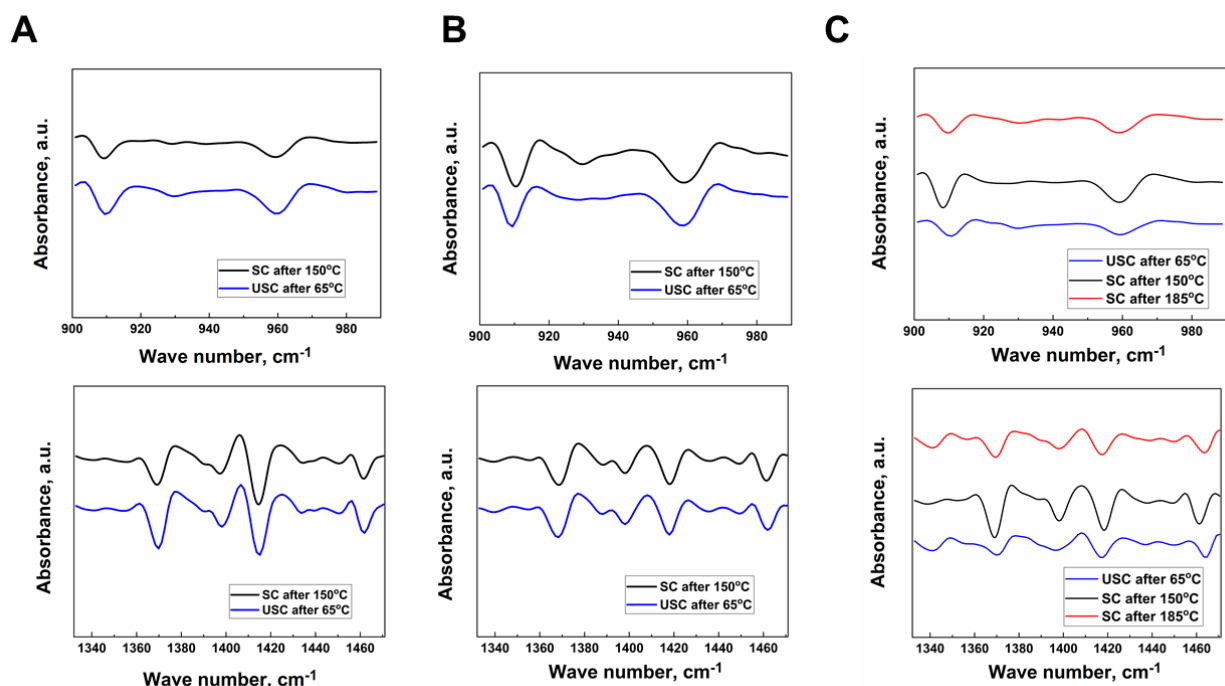

**Fig. S8** Second derivatives of the IR spectra of the TPU series for TPU-MDI (A), TPU-IPDI (B) and TPU-HMDI (C), differing in the hard block structure and crystallized under different cooling conditions.

**Table S3** Effect of crystallization conditions on the phase composition of PBA for different TPUs taken at the same time interval after crystallization

| Sample preparation conditions | Cooling | Rate, °C/min | T <sub>max</sub> heat, °C | FSC*                | FTIR           | WAXS           |
|-------------------------------|---------|--------------|---------------------------|---------------------|----------------|----------------|
| PBA                           |         |              |                           |                     |                |                |
| stored at RT                  | -       |              |                           | $\alpha^{**}$       | $\alpha$       | $\alpha$       |
| recrystallized at RT          | UFC     | 30000        | 185                       | $\beta$             | -              | -              |
|                               | SC      | 20           | 65                        | -                   | $\beta$        | -              |
|                               | USC     | 2            | 65                        | -                   | $\alpha$       | -              |
| TPU-MDI                       |         |              |                           |                     |                |                |
| stored at RT                  | -       |              |                           | $\alpha+\beta^{**}$ | $\alpha+\beta$ | $\alpha+\beta$ |
| recrystallized at RT          | UFC     | 30000        | 185                       | $\alpha$            | -              | -              |
|                               | USC     | 2            | 185                       | $\alpha+\beta$      | -              | -              |
|                               | SC      | 20           | 150                       | -                   | $\alpha+\beta$ | $\alpha+\beta$ |
|                               | USC     | 2            | 65                        | -                   | $\alpha+\beta$ | -              |
| TPU-IPDI                      |         |              |                           |                     |                |                |
| stored at RT                  | -       |              |                           | $\alpha+\beta^{**}$ | $\alpha+\beta$ | $\alpha+\beta$ |
| recrystallized at RT          | UFC     | 30000        | 185                       | $\alpha$            | -              | -              |
|                               | USC     | 2            | 185                       | $\alpha+\beta$      | -              | -              |
|                               | SC      | 20           | 150                       | -                   | $\alpha+\beta$ | $\alpha+\beta$ |
|                               | USC     | 2            | 65                        | -                   | $\alpha+\beta$ | -              |

| TPU-HMDI             |     |       |     |                |                |          |
|----------------------|-----|-------|-----|----------------|----------------|----------|
| stored at RT         | -   |       |     | $\alpha^{**}$  | $\alpha$       | $\alpha$ |
| recrystallized at RT | UFC | 30000 | 185 | $\alpha+\beta$ | -              | -        |
|                      | SC  | 20    | 185 | -              | $\alpha+\beta$ | -        |
|                      | USC | 2     | 185 | $\alpha$       | -              | -        |
|                      | SC  | 20    | 150 | -              | $\alpha$       | $\alpha$ |
|                      | UFC | 30000 | 65  | $\alpha$       | -              | -        |
|                      | USC | 2     | 65  | $\alpha$       | $>\alpha$      | -        |

\*UFH/UFC – ultra-fast heating/cooling with rate of 30 000 °C/min

\*\*heating of the initial sample from RT to 185 °C

SC – slow cooling with rate of 20 °C/min

USC – ultra-slow cooling with rate of 2 °C/min

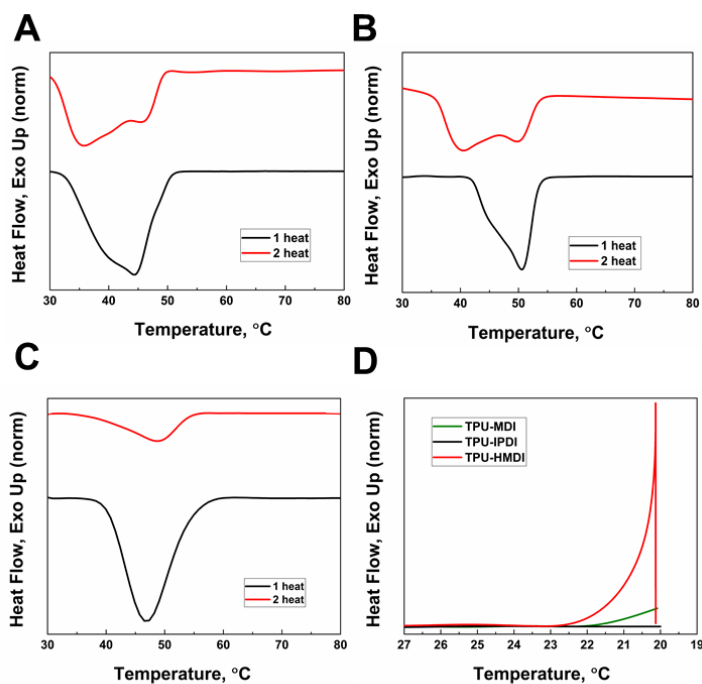

**Fig. S9** DSC heating curves up to 150 °C of the initial films (1st heating, black curves) and after 30-min crystallization at 20 °C (2nd heating, red curves) for TPU-MDI (A), TPU-IPDI (B), TPU-HMDI (C) and 1<sup>st</sup> cooling curves (D).

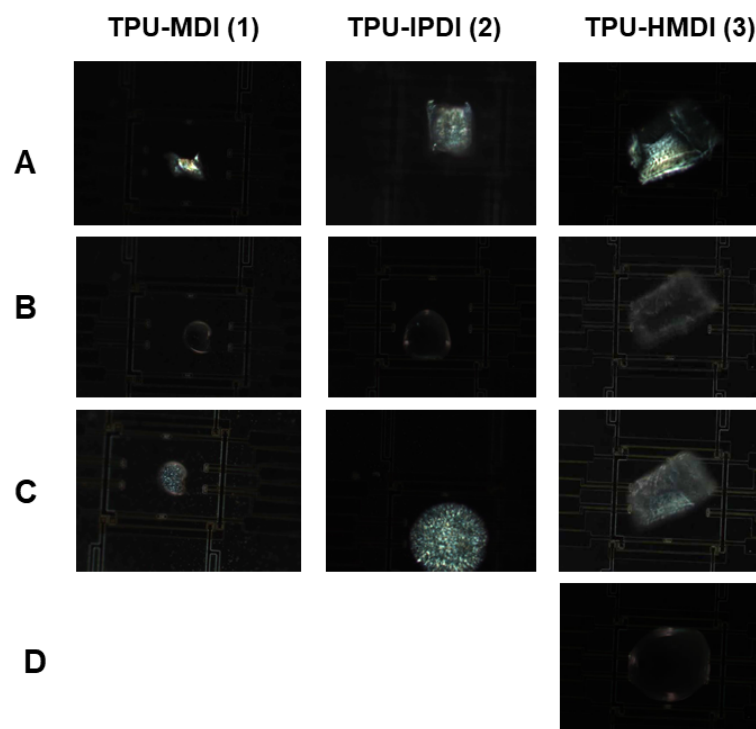

**Fig. S10** Micrographs of TPU microparticles in polarized light.

For TPU-IPDI and TPU-MDI: particle linear sizes are about 75x75 and 40x30 microns, respectively. Before the 1<sup>st</sup> heating (A); after the 1<sup>st</sup> heating, at 185 °C (B); after 20 hour annealing at RT, right before the 2<sup>nd</sup> heating (C). For TPU-HMDI: particle linear sizes are about 100x70 microns. Before the 1<sup>st</sup> heating (A); after the 1<sup>st</sup> heating, at 65 °C (B); after 20 hour annealing at RT, just before the 2<sup>nd</sup> heating to 185 °C (C); just after the 2<sup>nd</sup> heating, at 185 °C (D).
